# Supplementary material for: Alkali metal salt-assisted crystal structure switch of hybrid indium halides with near-unity photoluminescence quantum yield
Source: Royal Society of Chemistry journal article supplement (doi:10.1039/d4tc00152d), 2024-01-01
Supplement: d4tc00152d1.pdf [file d4tc00152d1.pdf]

## Electronic Supplementary Information

### Alkali metal salt-assisted crystal structure switch of hybrid indium halides with near-unity photoluminescence quantum yield

Shuai Zhang, Canxu Chen, Yuanjie Chen, Bingsuo Zou\*, and Ruosheng Zeng\*

*State Key Laboratory of Featured Metal Materials and Life-cycle Safety for Composite Structures, School of Physical Science and Technology, Guangxi University, Nanning 530004, China.*

\*Corresponding authors: zoubs@gxu.edu.cn; zengrsh@guet.edu.cn

### Experimental section

#### Materials

Methylamine hydrochloride ( $\text{CH}_6\text{ClN}$ , 98%), potassium chloride ( $\text{KCl}$ , 99.8%), and indium chloride ( $\text{InCl}_3$ , 98%) were purchased Macklin. Antimony chloride ( $\text{SbCl}_3$ , 99%) was purchased from Aladdin. Hydrochloric acid ( $\text{HCl}$ , 37 wt% in water) was purchased from Sinopharm Chemical Reagent Co., Ltd. Ethanol anhydrous ( $\text{CH}_3\text{CH}_2\text{OH}$ , 99.9%) was purchased Nanning Blue Sky Experimental Equipment Co., Ltd. All of these chemical agents are used as received without further purification.

#### Synthesis

##### Fabrication of LED device

The LED device was created by integrating a NUV-LED chip (365 nm). First, the epoxy resin was mixed with 10% $\text{Sb:MA}_4\text{InCl}_7$  powder, mixed phase and 10% $\text{Sb:MA}_2\text{KInCl}_6$  powder separately. Next, the two mixtures were applied onto the LED chip's surface. Finally, the LED chip covered with the mixtures was dried in a drying oven at 70 °C for 72 hours to produce the devices.

##### Synthesis of $\text{Sb:MA}_4\text{InCl}_7$

$\text{Sb:MA}_4\text{InCl}_7$  was synthesized via a slow evaporation crystallization method. In a 25 mL glass bottle, 4 mmol MA, 1-x mmol  $\text{InCl}_3$ , and x mmol  $\text{SbCl}_3$  (x = 0.005, 0.01, 0.03, 0.05, 0.1, 0.15, and 0.3) were dissolved in 4 mL of HCl. The solution was stirred magnetically at 60°C until it became

saturated, followed by filtration. The clear solution obtained after filtration was rapidly heated to 120°C and then cooled down to 60°C at a rate of 3°C/h. Slow evaporation at 60°C resulted in the formation of single crystals of Sb:MA<sub>4</sub>InCl<sub>7</sub>. The crystals were washed three times with ethanol and dried in an oven at 60°C for 6 hours.

### **Synthesis of Sb:MA<sub>2</sub>KInCl<sub>6</sub>**

Sb:MA<sub>2</sub>KInCl<sub>6</sub> was synthesized using the same slow evaporation crystallization method. In a 25 mL glass bottle, 2 mmol MA, 1.6 mmol KCl, 1-x mmol InCl<sub>3</sub>, and x mmol SbCl<sub>3</sub> (x = 0.005, 0.01, 0.03, 0.05, 0.1, 0.15, and 0.3) were dissolved in 3 mL of HCl. The solution was stirred magnetically at 60°C until it became saturated, followed by filtration. The clear solution obtained after filtration was rapidly heated to 120°C and then cooled down to 60°C at a rate of 3°C/h. Slow evaporation at 60°C resulted in the formation of single crystals of Sb:MA<sub>2</sub>KInCl<sub>6</sub>. The crystals were washed three times with ethanol and dried in an oven at 60°C for 6 hours.

### **Transformation from Sb:MA<sub>4</sub>InCl<sub>7</sub> to Sb:MA<sub>2</sub>KInCl<sub>6</sub>**

Sb:MA<sub>4</sub>InCl<sub>7</sub> and Sb:MA<sub>2</sub>KInCl<sub>6</sub> can be synthesized using a mechanochemical grinding method too. 4 mmol MA, 0.9 mmol InCl<sub>3</sub>, and 0.1 mmol SbCl<sub>3</sub> were placed in an agate mortar, and grinding with a pestle for 5 minutes yielded yellow-light-emitting 10% Sb:MA<sub>4</sub>InCl<sub>7</sub>. Then, adding 2 mmol KCl and continuous grinding resulted in a mixture emitting white light. Finally, adding 1 mmol InCl<sub>3</sub> and continuous grinding led to the formation of cyan-light-emitting 10% Sb:MA<sub>2</sub>KInCl<sub>6</sub>.

### **Characterization**

X-ray powder diffraction (XRD, Bruker D8 Discover) was employed to characterize the phase and crystal structure. X-ray photoelectron spectroscopy (XPS, Thermo Fisher Scientific ESCALAB250Xi) was utilized for identifying the elemental composition and chemical state. The Horiba Jobin Yvon Fluorolog-3 spectrometer was used to measure steady-state photoluminescence spectra, photoluminescence efficiency, and temperature-dependent PL spectra. Time-resolved spectra were collected using the Edinburgh FLS 1000 fluorescence spectrometer. Absorption spectra were measured with the UV-VIS-NIR spectrophotometer (PerkinElmer Instruments,

Lambda750). Thermogravimetric analysis (TGA) was performed on the SHIMADZU DTG-60H by increasing the temperature from RT to 900 °C at a heating rate of 10 °C/min in a nitrogen environment. Device performance characterization was conducted using a white light LED detection system.

## **DFT calculations**

DFT calculations were conducted using the Vienna ab initio Simulation Package (VASP) code<sup>1</sup> with the projection-augmented wave (PAW) method. The Perdew-Burke-Ernzerhof (PBE)<sup>2</sup> generalized gradient approximation (GGA) was employed as the exchange-correlation functional for structural relaxations and total-energy calculations of all structures. A cutoff energy of 350 eV and a convergence accuracy of  $1 \times 10^{-4}$  eV were used for the plane wave. The atomic stress convergence criterion for ion relaxation was set to be less than 0.005 eV/Å per atom. Data processing and graphical plotting were carried out using VESTA and Origin software.

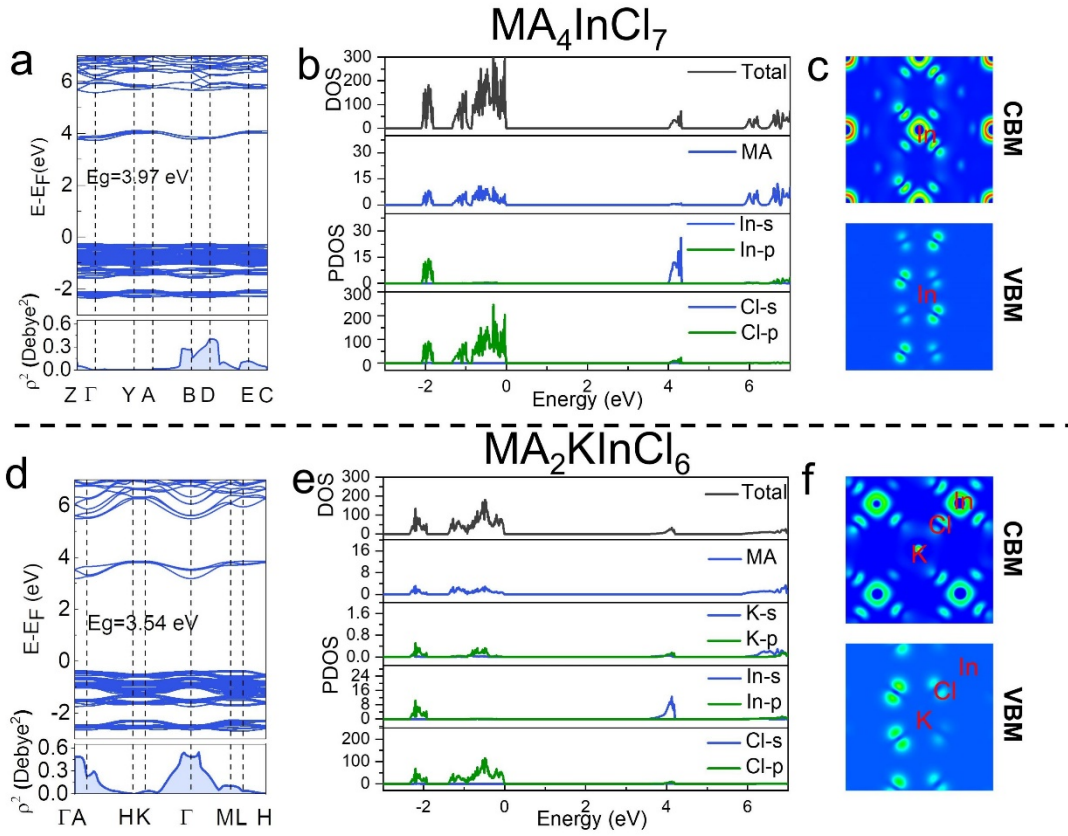

**Fig. S1** Band structures (a.), density of states (b), and charge densities (c) of  $\text{MA}_4\text{InCl}_7$ . Band structures (d.), density of states (e), and charge densities (f) of  $\text{MA}_2\text{KInCl}_6$ .

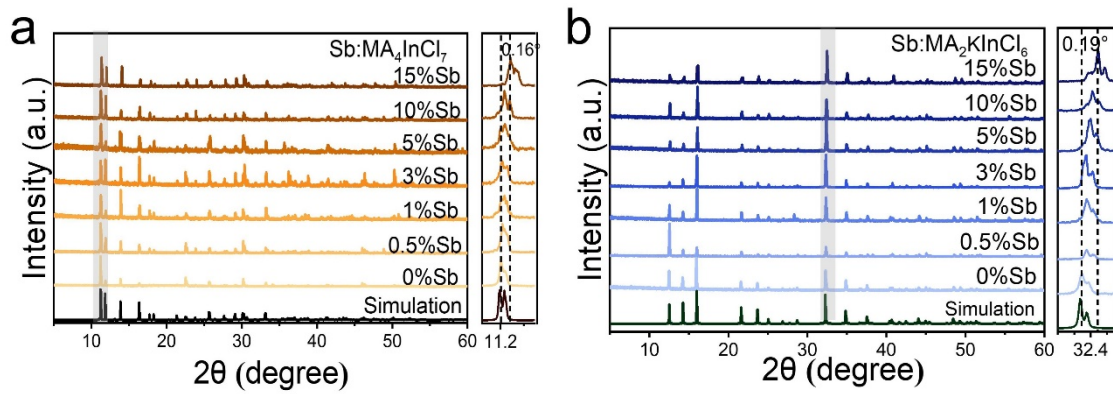

**Fig. S2** XRD patterns of  $\text{Sb:MA}_4\text{InCl}_7$  (a) and  $\text{Sb:MA}_2\text{KInCl}_6$  (b) doped with different concentrations of  $\text{Sb}^{3+}$ .

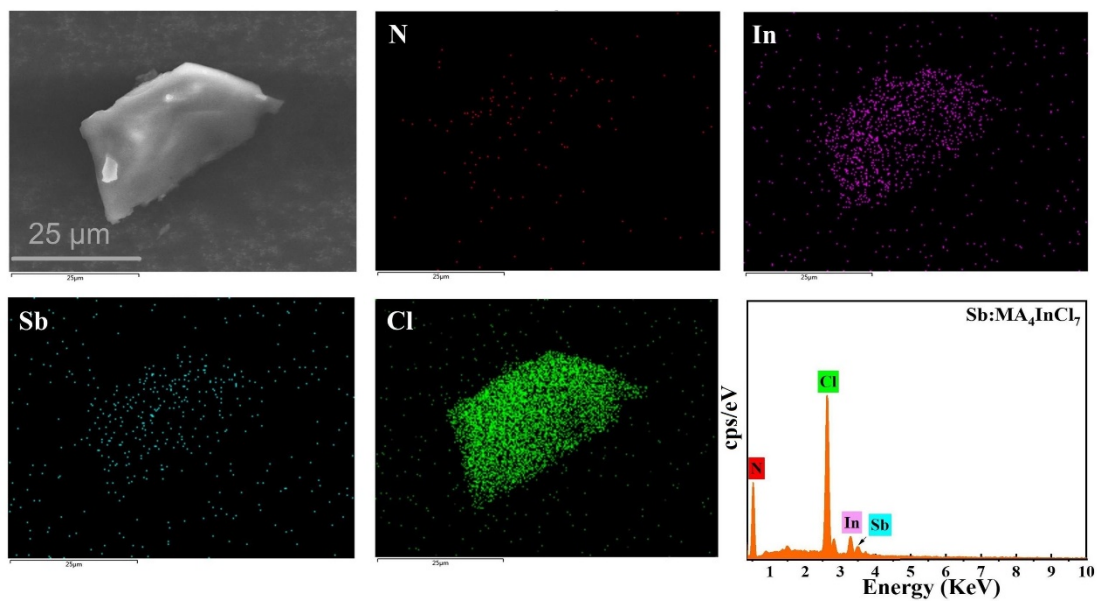

**Fig. S3** EDS mapping of N, In, Sb, and Cl element of Sb:MA<sub>4</sub>InCl<sub>7</sub>.

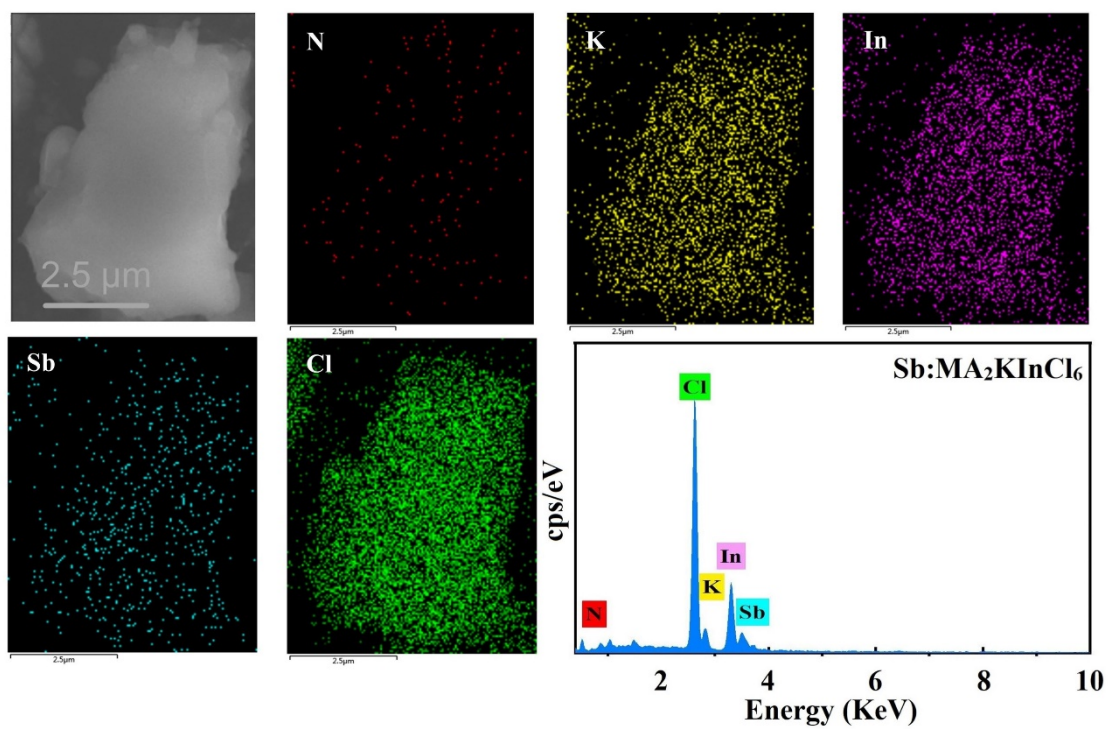

**Fig. S4** EDS mapping of N, K, In, Sb, and Cl element of Sb:MA<sub>2</sub>KInCl<sub>6</sub>.

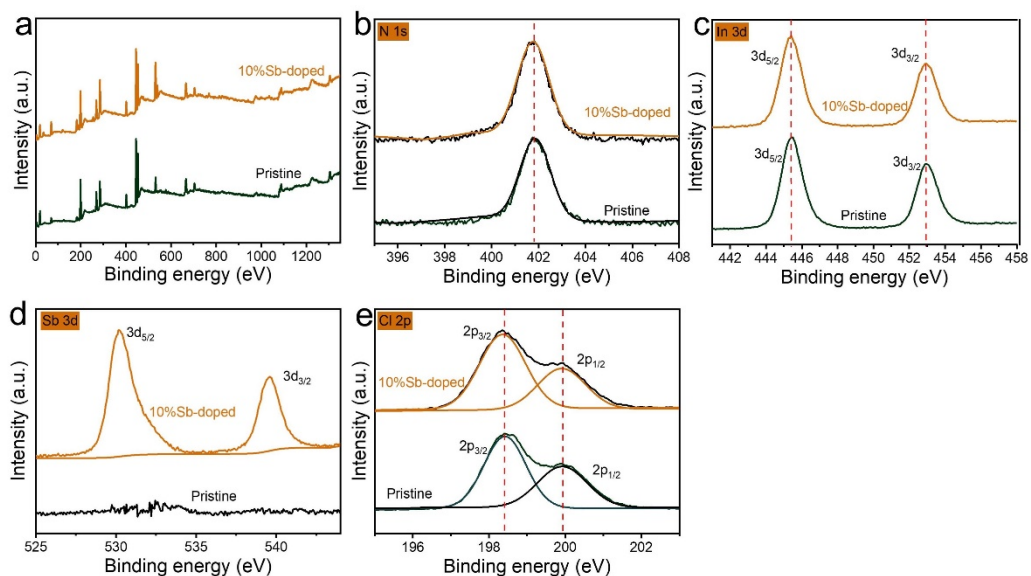

**Fig. S5** (a) XPS spectrum of  $\text{MA}_4\text{InCl}_7$  and 10%  $\text{MA}_4\text{InCl}_7$ . (b-e) High-resolution XPS spectra of N 1s, In 3d, Sb 3d and Cl 2p.

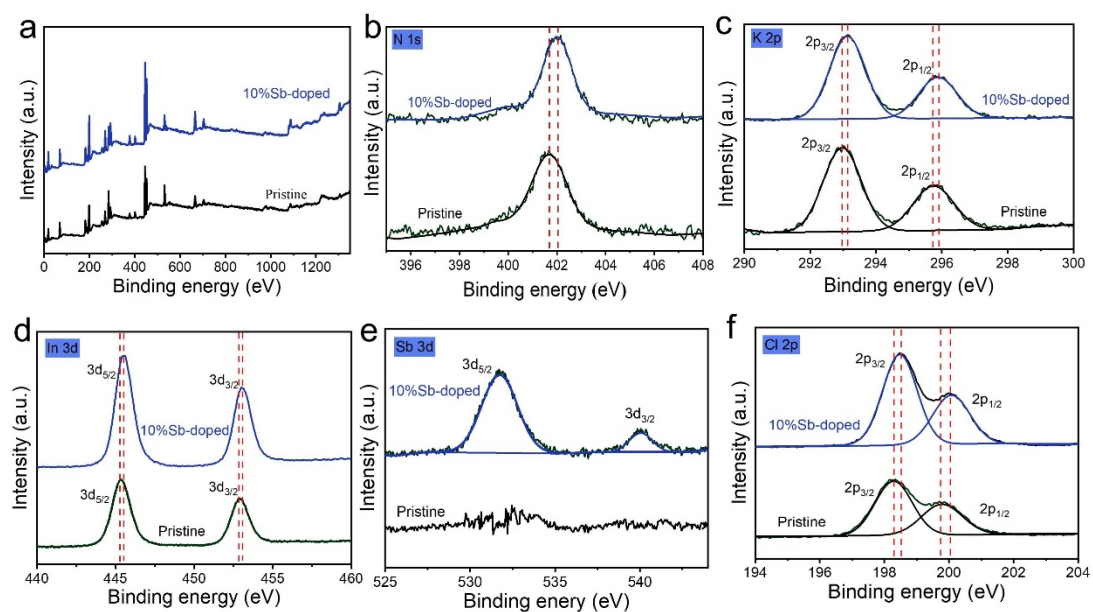

**Fig. S6** (a) XPS spectrum of  $\text{MA}_2\text{KInCl}_6$  and 10%  $\text{MA}_2\text{KInCl}_6$ . (b-f) High-resolution XPS spectra of N 1s, K 2p, In 3d, Sb 3d and Cl 2p.



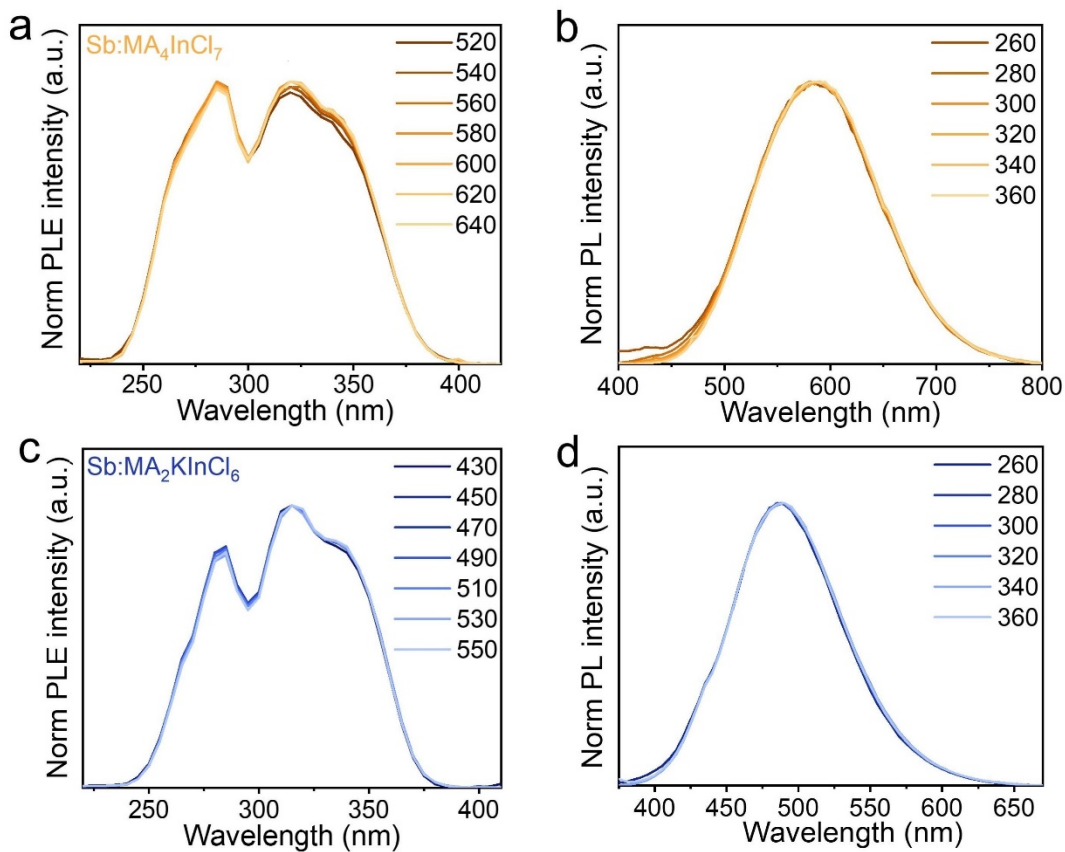

**Fig. S9** PLE spectra (a) and PL spectra (b) of Sb: MA<sub>4</sub>InCl<sub>7</sub> at different excitation wavelengths; PLE spectra (c) and PL spectra (d) of Sb: MA<sub>2</sub>KInCl<sub>6</sub> at different excitation wavelengths.

**Table S3** The bond lengths and bond angles data of Sb-doped MA<sub>4</sub>InCl<sub>7</sub> structure at 0, 80, 100, 200,



300, and 400K.

| <b>Sb-doped MA<sub>4</sub>InCl<sub>7</sub></b> |               | <b>0K</b> | <b>80K</b> | <b>100K</b> | <b>200K</b> | <b>300K</b> | <b>400K</b> |
|------------------------------------------------|---------------|-----------|------------|-------------|-------------|-------------|-------------|
| Bond<br>length(Å)                              | Sb1-Cl13      | 2.54024   | 2.55419    | 2.65605     | 2.66706     | 2.47176     | 2.67559     |
|                                                | Sb1-Cl14      | 2.54024   | 2.63445    | 2.56839     | 2.58004     | 2.67497     | 2.86234     |
|                                                | Sb1-Cl17      | 2.55783   | 2.57883    | 2.57491     | 2.56849     | 2.57347     | 2.57113     |
|                                                | Sb1-Cl18      | 2.55783   | 2.67359    | 2.66539     | 2.70751     | 2.73053     | 2.66677     |
|                                                | Sb1-Cl21      | 2.55788   | 2.58502    | 2.67357     | 2.6457      | 2.93019     | 2.69308     |
|                                                | Sb1-Cl22      | 2.55794   | 2.6307     | 2.65538     | 2.46432     | 2.78299     | 2.77101     |
| Band<br>angles(°)                              | Cl13-Sb1-Cl17 | 90.2231   | 86.4625    | 91.9172     | 91.3514     | 92.5547     | 104.5111    |
|                                                | Cl13-Sb1-Cl18 | 89.7769   | 97.1232    | 95.182      | 101.9801    | 97.2061     | 79.0805     |
|                                                | Cl13-Sb1-Cl21 | 88.9039   | 88.1263    | 91.0542     | 79.1399     | 100.6001    | 100.0175    |
|                                                | Cl13-Sb1-Cl22 | 91.0963   | 88.102     | 85.0439     | 91.3396     | 84.8746     | 78.9678     |
|                                                | Cl14-Sb1-Cl17 | 89.7769   | 88.7554    | 89.23       | 81.883      | 92.2096     | 93.9395     |
|                                                | Cl14-Sb1-Cl18 | 90.2231   | 87.4637    | 83.3848     | 84.6293     | 78.1379     | 83.2136     |
|                                                | Cl14-Sb1-Cl21 | 91.0961   | 89.2054    | 102.482     | 94.6802     | 85.4852     | 82.0855     |
|                                                | Cl14-Sb1-Cl22 | 88.9037   | 94.2261    | 81.3846     | 94.4368     | 88.657      | 97.6995     |
|                                                | Cl17-Sb1-Cl21 | 88.8392   | 86.2543    | 92.1473     | 86.1387     | 90.4565     | 90.9556     |
|                                                | Cl17-Sb1-Cl22 | 91.1619   | 89.5378    | 89.3006     | 91.1206     | 94.333      | 92.8521     |
|                                                | Cl18-Sb1-Cl21 | 91.1608   | 89.3961    | 89.7863     | 94.1199     | 87.2928     | 78.773      |
|                                                | Cl18-Sb1-Cl22 | 88.8381   | 95.0242    | 89.2601     | 90.7853     | 87.0378     | 97.4222     |

**Table S4** The bond lengths and bond angles data of Sb-doped MA<sub>2</sub>KInCl<sub>6</sub> structure at 0, 80, 100, 200, 300, and 400K.

| <b>Sb-doped MA<sub>2</sub>KInCl<sub>6</sub></b> |               | <b>0K</b> | <b>80K</b> | <b>100K</b> | <b>200K</b> | <b>300K</b> | <b>400K</b> |
|-------------------------------------------------|---------------|-----------|------------|-------------|-------------|-------------|-------------|
| Bond<br>length(Å)                               | Sb1-Cl3       | 2.52474   | 2.80609    | 2.79592     | 2.8968      | 2.79063     | 2.69388     |
|                                                 | Sb1-Cl6       | 2.53766   | 2.68327    | 2.63658     | 2.8359      | 2.69198     | 2.75503     |
|                                                 | Sb1-Cl9       | 2.53134   | 2.55521    | 2.73003     | 2.5876      | 2.662       | 2.59735     |
|                                                 | Sb1-Cl10      | 2.55406   | 2.58951    | 2.59906     | 2.48828     | 2.73268     | 2.73358     |
|                                                 | Sb1-Cl13      | 2.55717   | 2.6918     | 2.64585     | 2.57604     | 2.71956     | 2.58477     |
|                                                 | Sb1-Cl16      | 2.5697    | 2.6272     | 2.70363     | 2.57961     | 2.66105     | 2.75196     |
| Band<br>angles(°)                               | Cl3-Sb1-Cl6   | 92.2389   | 95.3678    | 90.7192     | 86.3066     | 98.5961     | 88.5557     |
|                                                 | Cl3-Sb1-Cl9   | 92.6564   | 92.6767    | 85.1857     | 96.1995     | 94.9449     | 86.3222     |
|                                                 | Cl3-Sb1-Cl13  | 89.7584   | 83.4657    | 90.9989     | 90.3762     | 81.8804     | 97.7936     |
|                                                 | Cl3-Sb1-Cl16  | 86.9198   | 82.7375    | 86.5848     | 88.7675     | 72.9384     | 87.7269     |
|                                                 | Cl6-Sb1-Cl9   | 91.6907   | 95.5413    | 96.0209     | 86.5799     | 80.9247     | 89.6176     |
|                                                 | Cl6-Sb1-Cl10  | 89.9129   | 87.8167    | 87.5648     | 89.3689     | 104.637     | 91.5465     |
|                                                 | Cl6-Sb1-Cl13  | 87.3661   | 87.0786    | 84.2912     | 85.6002     | 104.3259    | 84.6076     |
|                                                 | Cl9-Sb1-Cl10  | 86.6811   | 86.7387    | 86.4111     | 83.0492     | 88.8986     | 84.1618     |
|                                                 | Cl9-Sb1-Cl16  | 90.2902   | 87.6301    | 96.0209     | 89.2593     | 85.406      | 82.8346     |
|                                                 | Cl10-Sb1-Cl13 | 90.9373   | 96.9889    | 97.4132     | 89.7692     | 92.1401     | 91.6896     |
|                                                 | Cl10-Sb1-Cl16 | 90.9498   | 94.0968    | 95.6561     | 95.5023     | 84.5813     | 90.9128     |
|                                                 | Cl13-Sb1-Cl16 | 90.6858   | 89.6485    | 92.0338     | 99.1685     | 88.9878     | 103.1564    |

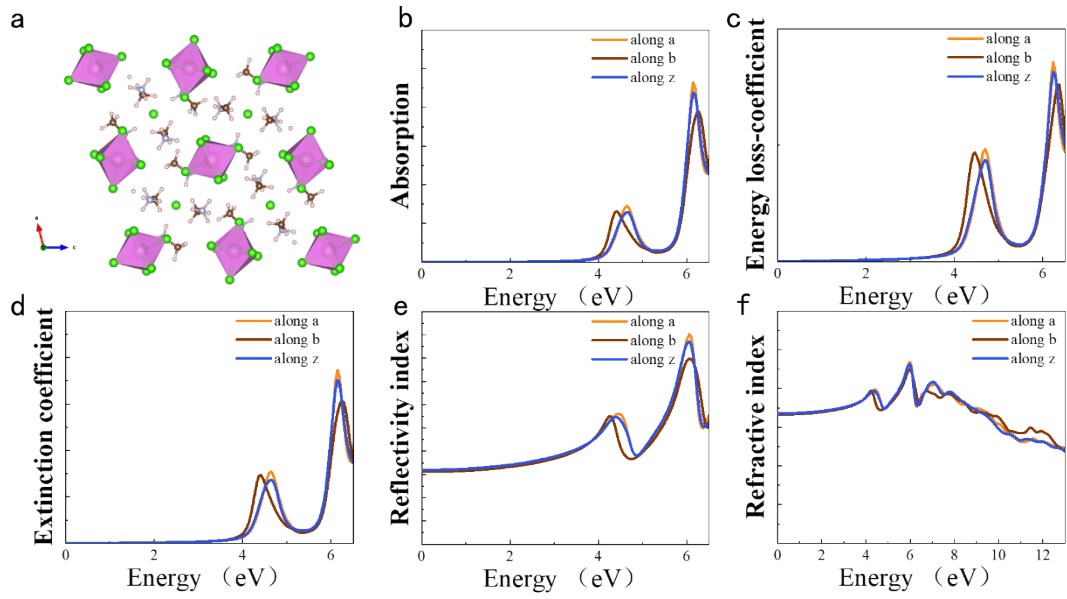

**Fig. S10** (a) Crystal structures of  $\text{MA}_4\text{InCl}_7$ ; (b-c) absorption, energy loss coefficient, extinction coefficient, reflectivity index and refractive index of pristine  $\text{MA}_4\text{InCl}_7$ .

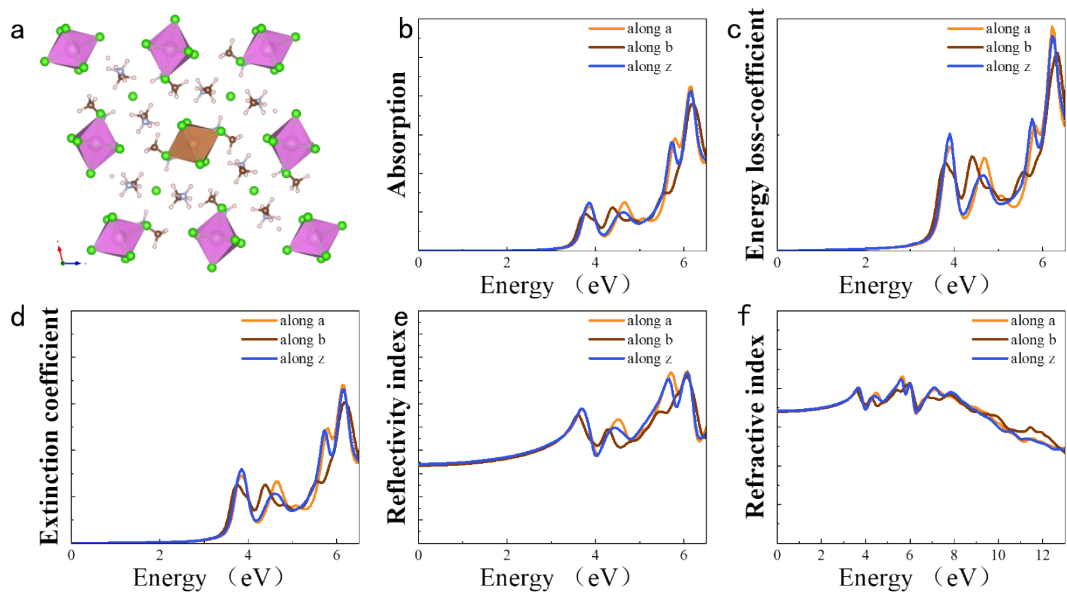

**Fig. S11** (a) Crystal structures of  $\text{Sb:MA}_4\text{InCl}_7$ ; (b-c) absorption, energy loss coefficient, extinction coefficient, reflectivity index and refractive index of pristine  $\text{Sb:MA}_4\text{InCl}_7$ .

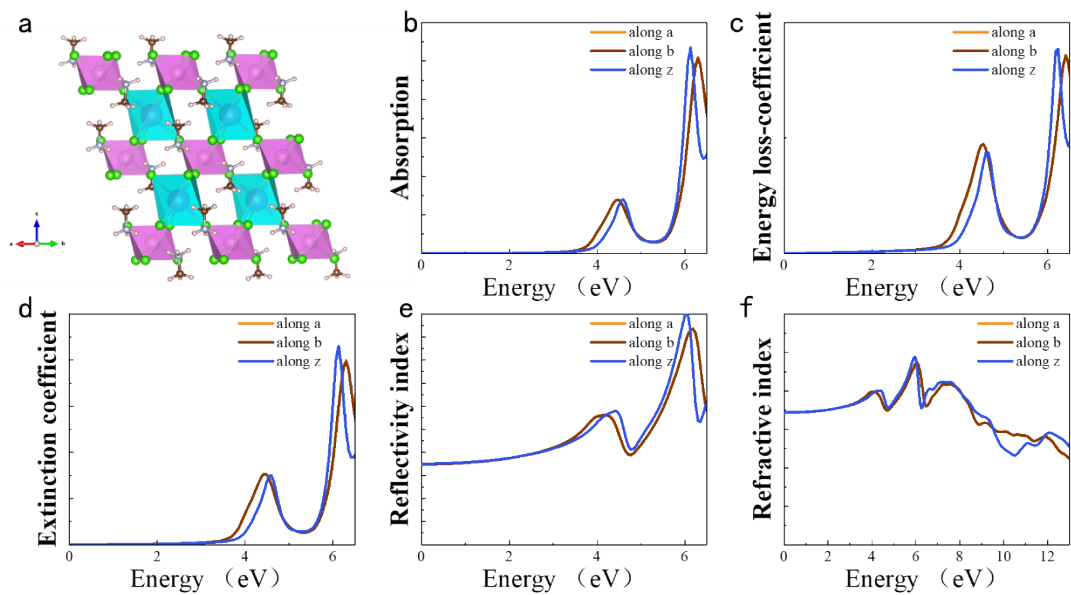

**Fig. S12** (a) Crystal structures of  $\text{MA}_2\text{KInCl}_6$ ; (b-c) absorption, energy loss coefficient, extinction coefficient, reflectivity index and refractive index of pristine  $\text{MA}_2\text{KInCl}_6$ .

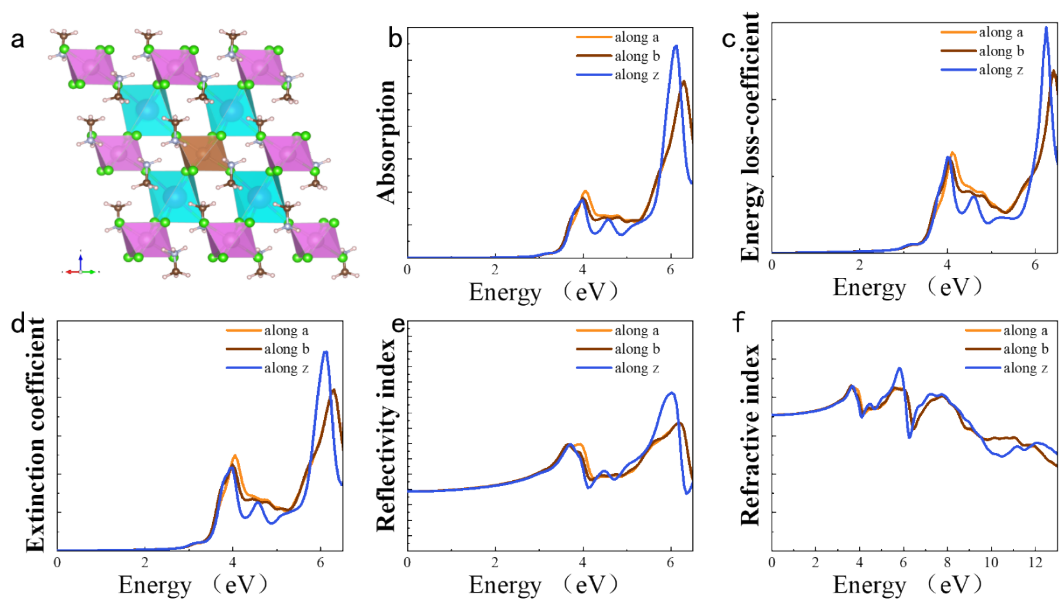

**Fig. S13** (a) Crystal structures of  $\text{Sb:MA}_2\text{KInCl}_6$ ; (b-c) absorption, energy loss coefficient, extinction coefficient, reflectivity index and refractive index of pristine  $\text{Sb:MA}_2\text{KInCl}_6$ .

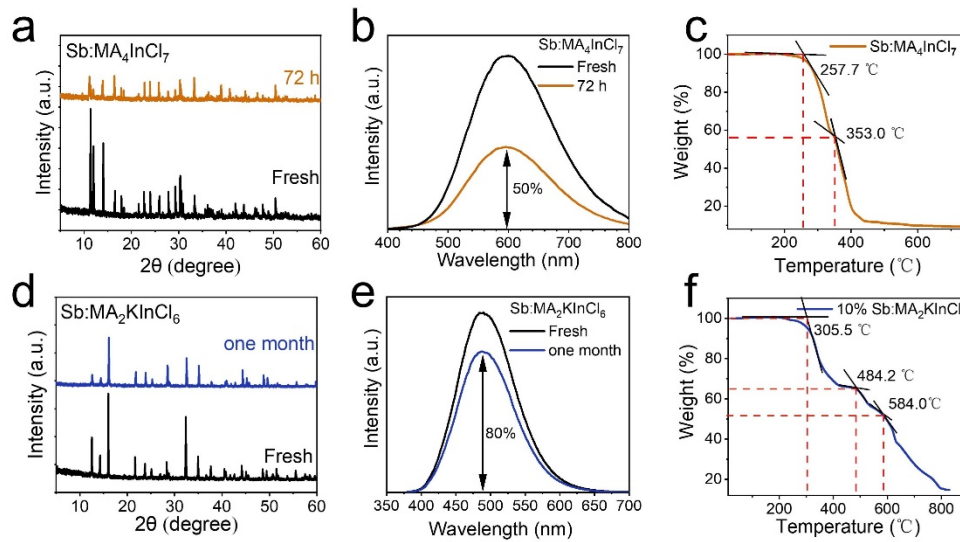

**Fig. S14** Structure and PL stability in air, XRD patterns, PL spectra, and thermogravimetric analysis curves of 10%Sb:MA<sub>4</sub>InCl<sub>7</sub> (a-c) and 10%Sb:MA<sub>2</sub>KInCl<sub>6</sub> (d-f).

## Reference

- [1] G. Kresse, J. Furthmuller, Phys Rev B Condens Matter 1996, 54, 11169.
- [2] J. P. Perdew, K. Burke, M. Ernzerhof, Phys Rev Lett 1996, 77, 3865.
